# Supplementary material for: Prolonged activity of HERV-K(HML2) in Old World Monkeys accounts for recent integrations and novel recombinant variants
Source: Frontiers journal article supplement (doi:10.3389/fmicb.2022.1040792), 2022-12-01
Supplement: Data_Sheet_1.zip [file Data_Sheet_1.zip]

## Sheet: Table S1. Human_HML2
1) COMPARATIVE GENOMICS with respect to Subramanian et al. 2011										Coordinates in M. Fasicularis	Coordinates in M.mulata
hg19	classified as	refined coordinates (hg38)	strand	locus	Vargiu ID	subgroup	Species of first acquisition (Subramanian)	comparative genomics (verified)	notes	Jun. 2013 5.0/macFas5 Assembly
chr1:75842927-75853182	Full-Length/near F.L. (Table 1)	chr1:75377086-75383458	+	1p31.1	5931	5LTR_PBS_MA_CA_NC_DU_IN_SU_TM_PPT_3LTR	Human Specific	Human Specific		NP	NP		NP- Not present
chr1:﻿36955490-36956728	Other HML-2 and HML-2-like (Table 2)	chr1:36488984-36491127	-	1p34.3	NP		Orangutan	Chimp, Gorilla, Orangutan	very long 3'LTR	NP	NP		Text highlighted in red indicates discripancies with that reported in Subramanian et al
chr1:12840274-12845378	Other HML-2 and HML-2-like (Table 2)	chr1:12780115-12785935	-	1p36.21a	5820	5LTR_PBS_CA_NC_DU_Prot_RT_IN	Orangutan	Human Specific		NP	NP		* indicates presence of solitary LTRs
﻿chr1:13458305-13467826	Full-Length/near F.L. (Table 1)	chr1:13352736-13362257	+	1p36.21b	NP		Orangutan	Chimp, Gorilla, Orangutan		NP	NP
chr1:13679214-13688558	Other HML-2 and HML-2-like (Table 2)	chr1:13352736-13362257	+	1p36.21c	5824	5LTR_PBS_CA_NC_DU_Prot_RT_IN_SU_TM_PPT_3LTR	Orangutan	Chimp, Orangutan, Gibbon*, Rhesus*	present as soloLTR in M.Fascicularis	chr1:215186826-215187825*	chr1:211553367-211554366
chr1:150600635-150608252	Full-Length/near F.L. (Table 1)	chr1:150632808-150635885	-	1q21.3	6062	Prot_RT_IN_TM_PPT	Orangutan	Gibbon		NP	NP
chr1:155596465-155605494	Full-Length/near F.L. (Table 1)	chr1:155626666-155635845	-	1q22	6069	5LTR_PBS_MA_CA_NC_DU_Prot_RT_IN_SU_TM_PPT_3LTR	Human Specific	Human Specific		NP	NP
chr1:160660602-160669777	Full-Length/near F.L. (Table 1)	chr1:160690785-160699987	+	1q23.3	6079	5LTR_PBS_MA_CA_NC_DU_Prot_RT_IN_SU_TM_PPT_3LTR	Gorilla	Chimp, Gorilla*	HML2 secondary integration within HERVK11 (in oragutan: only HERVK11)	NP	NP
chr1:166574603-166580258	Full-Length/near F.L. (Table 1)	chr1:166605366-166611021	-	1q24.1	6089	5LTR_PBS_IN_SU_TM_3LTR	Rhesus	Chimp, Gorilla, Orangutan, Gibbon, Rhesus*		chr1:24646150-24647033*	chr1:24056459-24057342
chr1:207805630-207814597	Full-Length/near F.L. (Table 1)	chr1:207635112-207639291	-	1q32.2	6171	MA_NC_DU_Prot_IN_SU_PPT_3LTR	Orangutan	Chimp, Gorilla, Orangutan		NP	NP
chr1:﻿238925595-238927773	Other HML-2 and HML-2-like (Table 2)	chr1:238762295-238764473	-	1q43	NP		Rhesus	Chimp, Gorilla, Orangutan, Gibbon, Rhesus		chr1:10690021-10692195	chr1:10286182-10288354
chr2:130719470-130727258	Full-Length/near F.L. (Table 1)	chr2:129961965-129965044	-	2q21.1	679	NC_RT_IN_SU_TM_PPT_3LTR	Human Specific	Human Specific		NP	NP
chr3:75600429-75609137	Full-Length/near F.L. (Table 1)	chr3:75551314-75559999	+	3p12.3	985	5LTR_PBS_MA_CA_NC_DU_Prot_RT_IN_SU_TM_PPT_3LTR	Chimp	Chimp, Gorilla		NP	NP
chr3:9883434-9896394	Full-Length/near F.L. (Table 1)	chr3:9847662-9854552	-	3p25.3	864	5LTR_PBS_CA_NC_DU_Prot_IN_TM_PPT_3LTR	Orangutan	Chimp*, Gorilla, Orangutan		NP	NP
chr3:101410958-101420097	Full-Length/near F.L. (Table 1)	chr3:101691893-101701015	+	3q12.3	1045	5LTR_PBS_MA_CA_NC_DU_Prot_RT_IN_SU_TM_PPT_3LTR	Gorilla	Chimp, Gorilla		NP	NP
chr3:112743309-112752255	Full-Length/near F.L. (Table 1)	chr3:113024462-113033435	-	3q13.2	1067	5LTR_PBS_MA_CA_NC_DU_Prot_RT_IN_SU_TM_PPT_3LTR	Human Specific	Human Specific		NP	NP
chr3:125609343-125618118	Full-Length/near F.L. (Table 1)	chr3:125890459-125899596	+	3q21.2	1102	5LTR_PBS_MA_CA_NC_DU_Prot_RT_IN_SU_TM_PPT_3LTR	Human Specific	Human Specific		NP	NP
chr3:148269969-148285564	Full-Length/near F.L. (Table 1)	chr3:148563690-148567609	-	3q24	1163	5LTR_PBS_MA_CA_NC_DU_Prot_RT_IN_TM_PPT_3LTR	Human Specific	Human Specific		NP	NP
chr3:185280349-185289375	Full-Length/near F.L. (Table 1)	chr3:185562561-185571727	-	3q27.2	1260	5LTR_PBS_MA_CA_NC_DU_Prot_RT_IN_SU_TM_PPT_3LTR	Human Specific	Human Specific		NP	NP
chr4:9660095-9669161	Other HML-2 and HML-2-like (Table 2)	chr4:9657956-9667550	+	4p16.1b	1312	5LTR_PBS_MA_CA_NC_DU_Prot_RT_IN_SU_TM_PPT_3LTR	Chimp	Chimp, Gorilla		NP	NP
chr4:9123671-9133085	Full-Length/near F.L. (Table 1)	chr4:9121786-9131367	+	4p16.1a	1303	5LTR_PBS_MA_CA_NC_DU_Prot_RT_IN_SU_TM_PPT_3LTR	Chimp	Chimp		NP	NP
chr4:233817-240110	Full-Length/near F.L. (Table 1)	chr4:241200-245670	+	4p16.3a	1284	5LTR_CA_NC_DU_Prot_RT_IN	Rhesus	Chimp, Gorilla, Orangutan, Gibbon, Rhesus		chr5:197693-204060	chr5:236403-242478
chr4:3979064-3988138	Other HML-2 and HML-2-like (Table 2)	chr4:3977324-3986912	-	4p16.3b	1289	5LTR_PBS_MA_CA_NC_DU_Prot_RT_IN_SU_TM_PPT_3LTR	Chimp	Chimp, Gorilla		NP	NP
chr4:69463940-69469131	Full-Length/near F.L. (Table 1)	chr4:68597991-68603505	+	4q13.2	1442	Prot_RT_IN_SU_TM_PPT_3LTR	Orangutan	Gorilla, Orangutan	not found in chimp	NP	NP
chr4:﻿161579938-﻿161582360	Full-Length/near F.L. (Table 1)	chr4:160658786-160661286	+	4q32.1	NP		Chimp	Human Specific		NP	NP
chr4:165916842-165926213	Full-Length/near F.L. (Table 1)	chr4:164995688-165002916	+	4q32.3	1685	5LTR_PBS_MA_CA_NC_DU_Prot_IN_SU_TM_PPT	Orangutan	Chimp, Gorilla*, Orangutan, Gibbon*		NP	NP
chr4:191027412-191034708	Full-Length/near F.L. (Table 1)	chr4:190106257-190113553	-	4q35.2	1741	5LTR_PBS_RT_IN_TM_PPT_3LTR	Human Specific	Chimp, Gorilla, Orangutan		NP	NP
chr5:46000498-46009896	Full-Length/near F.L. (Table 1)	chr5:46000057-46009900	-	5p12	1836	5LTR_PBS_CA_NC_DU_Prot_RT_IN_SU_TM_PPT_3LTR	Orangutan	Human Specific		NP	NP
chr5:30485216-30496057	Full-Length/near F.L. (Table 1)	chr5:30486653-30496098	-	5p13.3	1793	5LTR_PBS_MA_CA_NC_DU_Prot_RT_IN_SU_TM_PPT_3LTR	Human Specific	Human Specific		NP	NP
chr5:154015540-154024046	Other HML-2 and HML-2-like (Table 2)	chr5:154635953-154644655	-	5q33.2	2021	5LTR_PBS_CA_NC_DU_Prot_IN_SU_TM_PPT_3LTR	Chimp	Chimp, Gorilla*, Orangutan, Gibbon*,		NP	NP
chr5:156084725-156093754	Full-Length/near F.L. (Table 1)	chr5:156657714-156666885	-	5q33.3	2025	5LTR_PBS_MA_CA_NC_DU_Prot_RT_IN_SU_TM_PPT_3LTR	Human Specific	Human Specific		NP	NP
chr6:﻿57623896-57628704	Other HML-2 and HML-2-like (Table 2)	chr6:60654987-60660975	+	6p11.2	NP		Orangutan	Chimp, Gorilla, Orangutan		NP	NP
chr6:42861385-42871210	Full-Length/near F.L. (Table 1)	chr6:42893647-42903629	-	6p21.1	2131	5LTR_MA_CA_NC_DU_Prot_RT_IN_SU_TM_PPT_3LTR	Rhesus	Chimp, Gorilla, Orangutan, Gibbon, Rhesus	scaffold gap in M. fascicularis	chr4:127679273-127695785	chr4:126442436-126452909
chr6:28651075-28660727	Full-Length/near F.L. (Table 1)	chr6:28682591-28692958	+	6p22.1	2103	5LTR_PBS_MA_CA_NC_DU_Prot_RT_IN_SU_TM_PPT_3LTR	Orangutan	Chimp, Gorilla, Orangutan, Gibbon, Rhesus*		chr4:142146730-142147445*	chr4:141552678-141553393
chr6:78426847-78436056	Full-Length/near F.L. (Table 1)	chr6:77716945-77726366	-	6q14.1	2214	5LTR_PBS_MA_CA_NC_DU_Prot_RT_IN_SU_TM_PPT_3LTR	Human Specific	Human Specific		NP	NP
chr6:151177981-151184023	Full-Length/near F.L. (Table 1)	chr6:150859613-150862438	+	6q25.1	2373	IN_SU_TM_PPT_3LTR	Rhesus	Gibbon		NP	NP
chr7:4622242-4631501	Full-Length/near F.L. (Table 1)	chr7:4582426-4600400	-	7p22.1a	2410	5LTR_PBS_CA_NC_DU_Prot_RT_IN_SU_TM_PPT_3LTR	Human Specific	Human Specific		NP	NP
chr7:﻿4630561-﻿4640031	Full-Length/near F.L. (Table 1)	chr7:4590930-4600400	-	7p22.1b	NP		Human Specific	Human Specific		NP	NP
chr7:﻿65469689-65472384	Other HML-2 and HML-2-like (Table 2)	chr7:66004684-66007803	-	7q11.21	NP		Chimp	Chimp, Gorilla, Orangutan, Gibbon, Rhesus		chr3:56385497-56392744	chr3:53919281-53926536
chr7:104388995-104393267	Full-Length/near F.L. (Table 1)	chr7:104748548-104752820	-	7q22.2	2582	PBS_MA_CA_NC_DU_Prot_RT_IN	Human Specific	Human Specific		NP	NP
chr7:141452088-141455902	Full-Length/near F.L. (Table 1)	chr7:141751126-141756138	-	7q34	2654	PBS_MA_CA_NC_DU_Prot_RT	Orangutan	Chimp, Gorilla, Orangutan, Gibbon		NP	NP
chr8:17764720-17774133	Other HML-2 and HML-2-like (Table 2)	chr8:17908096-17916036	-	8p22	2744	5LTR_PBS_CA_NC_DU_Prot_RT_IN_SU_TM_PPT_3LTR	Rhesus	Chimp, Gorilla, Orangutan, Gibbon, Rhesus		chr8:17926996-17934863	chr8:18054809-18061616
chr8:7355397-7364785	Full-Length/near F.L. (Table 1)	chr8:7497875-7507263	-	8p23.1a	2704	5LTR_PBS_MA_CA_NC_DU_Prot_RT_IN_SU_TM_PPT_3LTR	Human Specific	Human Specific		NP	NP
chr8:8054727-8064174	Full-Length/near F.L. (Table 1)	chr8:8197178-8206699	+	8p23.1b	2720	5LTR_PBS_MA_CA_NC_DU_Prot_RT_IN_SU_TM_PPT_3LTR	Chimp	Chimp, Gorilla		NP	NP
chr8:12073978-12083338	Full-Length/near F.L. (Table 1)	chr8:12216469-12225988	-	8p23.1c	2734	5LTR_PBS_MA_CA_NC_DU_Prot_RT_IN_SU_TM_PPT_3LTR	Chimp	Chimp		NP	NP
chr8:12316539-12325980	Full-Length/near F.L. (Table 1)	chr8:12458983-12468471	-	8p23.1d	2736	5LTR_PBS_MA_CA_NC_DU_Prot_RT_IN_SU_TM_PPT_3LTR	Human Specific	Chimp		NP	NP
chr8:47175658-47183522	Full-Length/near F.L. (Table 1)	chr8:46264036-46271900	-	8q11.1	2794	5LTR_PBS_RT_IN_SU_TM_PPT_3LTR	Unknown	Human Specific		NP	NP
chr8:146246630-146254228	Other HML-2 and HML-2-like (Table 2)	chr8:145021244-145028842	-	8q24.3b	2985	5LTR_PBS_NC_RT_IN_SU_TM_PPT_3LTR	Gibbon	Gorilla*, Orangutan*, Gibbon	not found in chimp	NP	NP
chr8:140471350-140482803	Full-Length/near F.L. (Table 1)	chr8:139459906-139462993	-	8q24.3a	2976	MA_CA_NC_Prot_RT_IN_TM_PPT_3LTR	Human Specific	Human Specific		NP	NP
chr9:131612515-131619736	Full-Length/near F.L. (Table 1)	chr9:128850236-128857457	+	9q34.11	3164	5LTR_PBS_RT_IN_SU_TM_PPT_3LTR	Orangutan	Orangutan, Gibbon*		NP	NP
chr9:139674766-139684238	Full-Length/near F.L. (Table 1)	chr9:136780314-136789786	-	9q34.3	3177	5LTR_PBS_MA_CA_NC_RT_IN_3LTR	Orangutan	Chimp, Gorilla, Orangutan, Gibbon, Rhesus		chr15:1516229-1522954	chr15:1426180-1438227
chr10:6866481-6875494	Full-Length/near F.L. (Table 1)	chr10:6824179-6833641	-	10p14	3192	5LTR_PBS_CA_NC_DU_Prot_RT_IN_SU_TM_PPT_3LTR	Gorilla	Chimp	Big assembly gap in correspondent gorilla position	NP	NP
chr10:﻿27182399-﻿27183380	Full-Length/near F.L. (Table 1)	chr10:26893470-26894437	+	10p12.1	NP		Human Specfic	Human Specific*	soloLTR	NP	NP
chr10:101578459-101587714	Full-Length/near F.L. (Table 1)	chr10:99820812-99827988	-	10q24.2	3340	PBS_MA_CA_NC_DU_Prot_RT_IN_SU_TM_PPT	Human Specific	Human Specific		NP	NP
chr11:3468656-3478136	Full-Length/near F.L. (Table 1)	chr11:3447426-3456979	-	11p15.4	3379	5LTR_PBS_CA_NC_DU_Prot_RT_IN_SU_TM_PPT_3LTR	Human Specific	Human Specific		NP	NP
chr11:58764424-58773935	Full-Length/near F.L. (Table 1)	chr11:59000009-59005723	+	11q12.1	3505	CA_NC_RT_IN_SU_TM_PPT_3LTR	Chimp	Chimp, Gorilla, Orangutan, Gibbon		NP	NP
chr11:62143137-62150456	Full-Length/near F.L. (Table 1)	chr11:62375545-62383091	-	11q12.3	3517	5LTR_PBS_MA_CA_NC_DU_Prot_RT_IN_SU	Gibbon	Chimp, Gorilla, Orangutan, Gibbon		NP	NP
chr11:101565821-101575074	Full-Length/near F.L. (Table 1)	chr11:101695063-101704528	+	11q22.1	3625	5LTR_PBS_MA_CA_NC_DU_Prot_RT_IN_SU_TM_PPT_3LTR	Human Specific	Human Specific		NP	NP
chr11:118591757-118600741	Full-Length/near F.L. (Table 1)	chr11:118721015-118730174	-	11q23.3	3652	5LTR_PBS_MA_CA_NC_DU_Prot_RT_IN_SU_TM_PPT_3LTR	Gorilla	Chimp, Gorilla		NP	NP
chr12:34772559-34781752	Full-Length/near F.L. (Table 1)	chr12:34619620-34629282	-	12p11.1	3762	5LTR_PBS_MA_CA_NC_DU_Prot_RT_IN_SU_TM_PPT_3LTR	Chimp	Chimp		NP	NP
chr12:﻿55727215-55728183	Full-Length/near F.L. (Table 1)	chr12:55333431-55334399	+	12q13.2	NP		Human Specific	Human Specific*	soloLTR	NP	NP
chr12:58721427-58730671	Full-Length/near F.L. (Table 1)	chr12:58327644-58336915	-	12q14.1	3808	5LTR_PBS_MA_CA_NC_DU_Prot_RT_IN_SU_TM_PPT_3LTR	Human Specific	Human Specific		NP	NP
chr12:﻿111007843-111009325	Full-Length/near F.L. (Table 1)	chr12:110570038-110571520	+	12q224.11	NP		Human Specific	Human Specific		NP	NP
chr12:133667122-133673064	Other HML-2 and HML-2-like (Table 2)	chr12:133090536-133096478	-	12q24.33	3922	5LTR_PBS_CA_Prot_RT_IN_SU_TM_PPT_3LTR	Orangutan	Chimp*, Gorilla, Orangutan*		NP	NP
chr14:24478749-24484991	Other HML-2 and HML-2-like (Table 2)	chr14:24009696-24015776	-	14q11.2	4086	5LTR_PBS_MA_CA_NC_DU_Prot_RT_IN	Orangutan	Chimp, Gorilla*, Orangutan		NP	NP
chr14:106140479-106141043	Other HML-2 and HML-2-like (Table 2)	chr14:105673313-105676203	+	14q32.33	4227	IN	Rhesus	Gorilla, Orangutan	not found in chimp	chr7:170942771-170950097	chr7:167866284-167871711
chr15:﻿84829020-84832364	Other HML-2 and HML-2-like (Table 2)	chr15:84160268-84164397	+	15q25.2	NP		Orangutan	Chimp, Gorilla, Orangutan		NP	NP
chr16:﻿34231397-34234142	Full-Length/near F.L. (Table 1)	chr16:34997026-34999771	-	16p11.2	4370	CA_NC_DU_Prot_RT_IN	Unknown	Human Specific		NP	NP
chr16:﻿2976160-2977661	Other HML-2 and HML-2-like (Table 2)	chr16:2926159-2927660	+	16p13.3	NP		Rhesus	Chimp, Gorilla, Orangutan, Gibbon, Rhesus		chr20:3186267-3188781	chr20:2979399-2982248
chr17:7961703-7966506	Other HML-2 and HML-2-like (Table 2)	chr17:8057039-8063901	+	17p13.1	4422	CA_NC_DU_Prot_RT_IN_SU	Rhesus	Chimp, Gorilla, Orangutan, Gibbon, Rhesus		chr16:8173167-8180531	chr16:7855875-7863073
chr19:22758333-22766534	Full-Length/near F.L. (Table 1)	chr19:22575022-22581759	+	19p12c	4669	5LTR_PBS_MA_CA_NC_DU_Prot_RT_IN_TM_PPT	Orangutan	Gorilla	not found in chimp	NP	NP
chr19:20387557-20397362	Full-Length/near F.L. (Table 1)	chr19:20276591-20286703	+	19p12a	4636	5LTR_PBS_MA_CA_NC_DU_Prot_RT_IN_SU_TM_PPT_3LTR	Orangutan	Chimp, Gorilla, Orangutan		NP	NP
chr19:﻿385095-387637	Full-Length/near F.L. (Table 1)	chr19:385095-387637	+	19p13.3	NP		Orangutan	Chimp		NP	NP
chr19:28128022-28137359	Full-Length/near F.L. (Table 1)	chr19:27637590-27646453	-	19q11	4695	PBS_MA_CA_NC_DU_Prot_RT_IN_SU_TM_PPT_3LTR	Human Specific	Human Specific		NP	NP
chr19:36063336-36066273	Full-Length/near F.L. (Table 1)	chr19:35572527-35576532	-	19q13.12a	4712	IN_SU_TM_PPT	Orangutan	Chimp, Gorilla, Orangutan		NP	NP
chr19:37597576-37606732	Full-Length/near F.L. (Table 1)	chr19:37106647-37116164	-	19q13.12b	4716	5LTR_PBS_MA_CA_NC_DU_Prot_RT_IN_SU_TM_PPT_3LTR	Gibbon	Chimp, Gorilla, Orangutan		NP	NP
chr19:53243799-53253078	Other HML-2 and HML-2-like (Table 2)	chr19:52740440-52750454	-	19q13.41	4768	5LTR_CA_Prot_RT_IN_SU_PPT_3LTR	Orangutan	Chimp, Gorilla, Orangutan, Gibbon, Rhesus	defective structure with a lot of secondary integrations (but not in M.fascicularis!) and some assembly gaps (also in M.F.)	chr19:53436628-53439569	chr19:52419021-52420901
chr19:53862743-53868467	Full-Length/near F.L. (Table 1)	chr19:53359095-53364791	+	19q13.42	4776	RT_IN_SU_TM_3LTR	Orangutan	Chimp, Gorilla, Orangutan, Gibbon*, Rhesus*		chr19:54151394-54151873*	chr19:53108966-53109445
chr20:32714748-32724381	Full-Length/near F.L. (Table 1)	chr20:34126944-34136578	+	20q11.22	4833	5LTR_CA_NC_RT_IN_SU_TM_PPT_3LTR	Rhesus	Chimp, Gorilla, Orango, Gibbon, Rhesus		chr10:65505659-65515747	chr10:69302515-69311295
chr21:19933322-19942324	Full-Length/near F.L. (Table 1)	chr21:18561341-18569644	-	21q21.1	4873	5LTR_MA_CA_NC_DU_Prot_RT_IN_SU_TM_PPT_3LTR	Human Specific	Human Specific		NP	NP
chr22:18938674-18947848	Full-Length/near F.L. (Table 1)	chr22:18938674-18947848	+	22q11.21	6264	5LTR_PBS_MA_CA_NC_DU_Prot_RT_IN_SU_TM_PPT_3LTR	Human Specific	Human Specific		NP	NP
chr22:23880503-23890570	Other HML-2 and HML-2-like (Table 2)	chr22:23537740-23546900	+	22q11.23	6272	5LTR_PBS_CA_NC_DU_Prot_RT_IN_SU_TM_PPT_3LTR	Gorilla	Chimp, Gorilla		NP	NP
chrX:61959596-61967393	Other HML-2 and HML-2-like (Table 2)	chrX:62740079-62742584	+	Xq11.1	5423	IN_SU_TM	Unknown	Gorilla	chr region seems absent in other species	NP	NP
chrX:65680814-65690352	Other HML-2 and HML-2-like (Table 2)	chrX:66464290-66466342	-	Xq12	5449	MA_CA_NC_RT_IN_TM	Human Specfic	Chimp, Gorilla, Orangutan		NP	NP
chrX:﻿153817163-153819562	Other HML-2 and HML-2-like (Table 2)	chrX:154588662-154591282	+	Xq28a	NP		Orangutan	Chimp, Gorilla, Orangutan		NP	NP
chrX:﻿153836675-153844015	Other HML-2 and HML-2-like (Table 2)	chrX:154608422-154615759	-	Xq28b	NP		Human Specific	Human Specific		NP	NP
chrY:6826072-6833832	Full-Length/near F.L. (Table 1)	chrY:6958031-6965791	-	Yp11.2	5042	5LTR_CA_NC_RT_IN_SU_TM_PPT_3LTR	Chimp	Chimp	comparative genomics unreliable for Y chromosome	NP	NP
chrY:27558956-27563678	Other HML-2 and HML-2-like (Table 2)	chrY:25415255-25419369	+	Yq11.23b	5269	CA_DU_RT_IN	Chimp	Homo specific		NP	NP
chrY:26398760-26401299	Other HML-2 and HML-2-like (Table 2)	chrY:24251690-24254888	-	Yq11.23a	5252	DU_RT_IN	Chimp	Chimp	comparative genomics unreliable for Y chromosome	NP	NP
2) COMPARATIVE GENOMICS with respect to human HML2 loci NOT present in Subramanian et al. 2011
		hg38	strand	locus	Vargiu ID	subgroup		comparative genomics (verified)	notes	Coordinates in M. Fasicularis
		chr6:60654987-60660975	+	6q11.1	2153	MA_CA_NC_RT_IN_SU_PPT_3LTR		Chimp, Gorilla, Orangutan		NP	NP
